# Supplementary material for: Conditional Deletion of Foxg1 Delayed Myelination during Early Postnatal Brain Development
Source: MDPI journal article supplement (doi:10.3390/ijms241813921), 2023-09-10
Supplement: s1 [file s1]

**Table S1** Primers used for real-time qPCR

| Gene             | Forward                 | Reverse                  |
|------------------|-------------------------|--------------------------|
| GAPDH            | AGGTCGGTGTGAACGGATTTG   | TGTAGACCATGTAGTTGAGGTCA  |
| Notch1           | GCAACTGTCCTCTGCCATATAC  | GTCTTCAGACTCCTTGCATACC   |
| Hes1             | GAGGCGAAGGGCAAGAATAA    | GAATGCCGGGAGCTATCTTT     |
| Hes5             | AGTCCCAAGGAGAAAAACCGA   | GCTGTGTTTCAGGTAGCTGAC    |
| Id2              | CCCGGTGGACGACCCGATG     | CAGATGCCTGCAAGGACAGGATGC |
| Id4              | CAGTGCGATATGAACGACTGC   | GACTTTCTTGTTGGGCGGGAT    |
| Gsk-3 $\beta$    | TGGCAGCAAGGTAACCACAG    | CGGTTCTTAAATCGCTTGTCTCTG |
| $\beta$ -catenin | ATGGAGCCGGACAGAAAAGC    | CTTGCCACTCAGGGAAGGA      |
| Tcf4             | AACGATGATGAGGACCTGAC    | CAGCTTTCGGGTTTCAGATTC    |
| Sox10            | ATAACCTCATCCCTTGCCTAAC  | TGGATTGCCTCTGACTCTTTC    |
| Pdgfra           | AGAGTTACACGTTTGAGCTGTC  | GTCCCTCCACGGTACTCCT      |
| Olig2            | GAAGCAGATGACTGAGCCCGAG  | CCCGTAGATCTCGCTCACCAG    |
| Myrf             | CCTGTGTCCGTGGTACTGTG    | TCACACAGGCGGTAGAAGTG     |
| Sox4             | CGGCTGCATCGTTCTCTCC     | GGTAGACGTGCTTCACTTTCTTG  |
| Wnt3a            | CTCCTCTCGGATACCTCTTAGTG | GCATGATCTCCACGTAGTTCCTG  |
